# Supplementary material
Source: Springer Nature journal article supplement (https://www.springermedizin.de/resource/supplementary/12933_2009_201_MOESM6_ESM.pdf/9539820)
Supplement: MOESM6 [file 9539820]

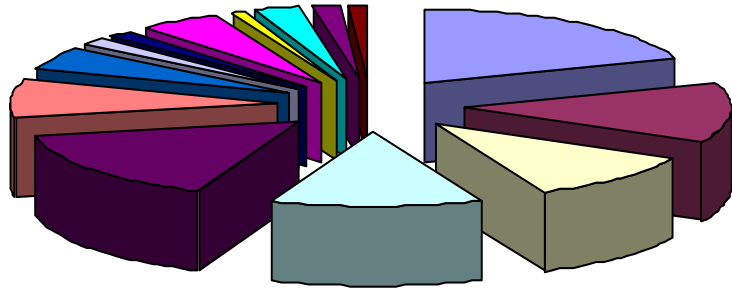

- multicellular organismal process
- anatomical structure development
- system development
- multicellular organismal development
- developmental process
- organ development
- nervous system development
- G-protein signaling coupled to cAMP nucleotide second messenger
- cAMP-mediated signaling
- ion transport
- oligodendrocyte differentiation
- cell-cell adhesion
- homophilic cell adhesion
- G-protein signaling adenylate cyclase activating pathway
